# Supplementary material for: Loss of SMAD4 Promotes Colorectal Cancer Progression by Recruiting Tumor-Associated Neutrophils via the CXCL1/8–CXCR2 Axis
Source: Oxford University Press journal article supplement (doi:10.1158/1078-0432.ccr-18-3684), 2019-01-31
Supplement: 10780432ccr183684-sup-211975_2_supp_5275800_pl7l4g.docx [file 10780432ccr183684-sup-211975_2_supp_5275800_pl7l4g.docx]

**Supplementary Table S2.** Kinase Inhibitors

Substance Target of inhibition IC50 Concentration used Company

SC-514 IκB kinase2 IKK2 : 3-12μM 12μM Cayman chemical

Indirubin cyclin CDK1/5 : 10μM 2.5μM Cayman chemical

GSK-3β GSK3β : 2.5μM

ZM336372 Raf-1 70nM 70nM Cayman chemical

SP 600125 JNK1-3 JNK1-3 : 0.11μM 0.2μM Cayman chemical

R-Roscoviline CDK2/cycline E CDK2 : 0.1μM 0.1μM Cayman chemical

Rapamycin mTOR 5pM 5pM Cayman chemical

LY294002 PI3K 1.4μM 2μM Cayman chemical

VU0359595 PLD1 3.7nM 3.7nM Cayman chemical

Olomoucine CDK1/cyclinB CDK1/cyclin B : 2μM 3μM Enzo life science

CDK5/p35 CDK5/p35 : 3μM

AG-490 JAK2 5μM 10uM Cayman chemical

LFM-A13 BTK BTK : 2.5μM 10μM Cayman chemical

Plk PIk : 10μM

PD 184161 MEK/ERK MEK1/2 : 10-100nM 10μM Cayman chemical

IC50, median inhibitory concentration

l
