# Supplementary material for: Loss of SMAD4 Promotes Colorectal Cancer Progression by Recruiting Tumor-Associated Neutrophils via the CXCL1/8–CXCR2 Axis
Source: Oxford University Press journal article supplement (doi:10.1158/1078-0432.ccr-18-3684), 2019-01-31
Supplement: 10780432ccr183684-sup-211975_2_supp_5275801_pl7lng.docx [file 10780432ccr183684-sup-211975_2_supp_5275801_pl7lng.docx]

**Supplementary Table S3.** List of primers for ChIP assay

Region Forward ( ‘5- ‘3 ) Reverse ( ‘5- ‘3 )

CXCL1 TIE GTCTCAGAGAGCTCTGAATC CAGTCATTTAACCTGGTAGC

CXCL1 1st SBE CTGGAATCTGACATAATGGAC GCTGGAGCTATATTATCCTC

CXCL8 1st SBE TCAAGTCTTAGGTTGGTTGG CGACAGAGCAGTGAATTTGC

CXCL8 2nd SBE CAGTGTGGGCAAATTCACTG AGCACCAAGGAAGGGTTCTT

CXCL8 3rd SBE GGACACTAGGACATAAAGCC CATCTGGGTTCCAACTCTGG
