# Supplementary material for: Loss of SMAD4 Promotes Colorectal Cancer Progression by Recruiting Tumor-Associated Neutrophils via the CXCL1/8–CXCR2 Axis
Source: Oxford University Press journal article supplement (doi:10.1158/1078-0432.ccr-18-3684), 2019-01-31
Supplement: 10780432ccr183684-sup-211975_2_supp_5275804_pl7llg.docx [file 10780432ccr183684-sup-211975_2_supp_5275804_pl7llg.docx]

**Supplementary Table S6.** Tumor characteristics. Preoperative serum samples from another

cohort of 125 patients.

Characteristics 　 No. of Patients

Age, years

Mean ± SD 66.0 ± 12.5

Sex

Male 65

Female 60

Location

Colon 88

Rectum 37

Histology

tub1 / tub2 109

others 16

T factor

Tis / T1 / T2 85

T3 / T4 40

N factor

Negative 84

Positive 41

M factor

Negative 105

Positive 20

UICC-TNM Stage

0, I, II 75

III, IV 50

CEA, ng/mL

< 5 80

≥ 5 45

CA19-9, U/mL

< 37 104

≥ 37 21

CXCL1

≤ 8.8 63

> 8.8 62

CXCL8

≤ 13.7 63

> 13.7 62
